# Supplementary material for: Is the future already here? The impact of climate change on the distribution of the eastern coral snake (Micrurus fulvius)
Source: PeerJ. 2018 May 1;6:e4647. doi: 10.7717/peerj.4647 (PMC5935076; doi:10.7717/peerj.4647)
Supplement: Supplemental Information 2 — All species locality data used in the current Maxent models. Data source codes are as follows: ASU, Arizona State University; gbif, www.gbif.org; HerpNet, http://www.herpnet.org (now http://www.vertnet.org); idigbio, http://www.idigbio.org; MISS, Mississippi Museum of Natural History; NCMNS, NC Museum of Natural Sciences; UCH, originated at the Charleston Museum and are now part of the NC Museum of Natural Sciences. [file peerj-06-4647-s002.csv]

Species	Longitude	Latitude	Uncertainty_in_KM	YearCollected	State_Provi	DataSource	Catalog Number
M_fulvius	-84.969721	32.354813	2	1950	Georgia	HerpNet	5345
M_fulvius	-79.94743	32.96915	5	1950	South Carolina	UCH	51.64.1
M_fulvius	-80.490187	25.527909	3	1951	Florida	gbif	301635
M_fulvius	-81.870014	26.631183	5	1951	Florida	gbif	R-51696
M_fulvius	-84.1397	30.7269	0	1951	Georgia	HerpNet	54667
M_fulvius	-78.7081	34.7463	5	1951	North Carolina	NCSM	946
M_fulvius	-80.14673	32.77034	5	1951	South Carolina	UCH	51.46
M_fulvius	-80.285354	25.824662	4	1952	Florida	gbif	301634
M_fulvius	-80.972176	27.456406	25	1952	Florida	HerpNet	4882
M_fulvius	-83.982046	30.76065	3	1953	Georgia	HerpNet	11923
M_fulvius	-85.85465	31.314852	3	1954	AL	HerpNet	AUM
M_fulvius	-85.6365	30.1643	5	1954	Florida	NCSM	15321
M_fulvius	-82.056423	29.216444	5	1955	Florida	gbif	61342
M_fulvius	-88.756405	30.402411	5	1955	Mississippi	MISS	2241
M_fulvius	-81.4859	33.5489	1	1955	South Carolina	NCSM	8144
M_fulvius	-82.224461	31.410334	4	1956	Georgia	gbif	2889
M_fulvius	-79.5525	34.8861	0	1957	North Carolina	NCSM	948
M_fulvius	-82.421086	29.76772	5	1958	Florida	gbif	74135
M_fulvius	-82.18139	28.23333	5	1958	Florida	HerpNet	5745
M_fulvius	-82.194931	28.3664936	5	1958	Florida	HerpNet	24681
M_fulvius	-79.54882	34.85242	5	1958	North Carolina	NCSM	80396
M_fulvius	-87.958575	31.78727	5	1959	AL	HerpNet	AUM
M_fulvius	-77.8788	34.1308	5	1959	North Carolina	NCSM	947
M_fulvius	-81.872116	29.142764	5	1961	FL	HerpNet	AUM
M_fulvius	-81.203878	29.621675	0	1961	Florida	HerpNet	HE.4484
M_fulvius	-89.41503	31.169727	1	1961	Mississippi	HerpNet	16627
M_fulvius	-84.199253	30.194816	3	1962	Florida	HerpNet	19529
M_fulvius	-84.007432	30.149381	5	1962	Florida	HerpNet	19528
M_fulvius	-84.177482	31.632051	5	1962	georgia	idigbio	21451
M_fulvius	-82.28997	29.660996	5	1963	Florida	gbif	12610
M_fulvius	-84.302147	31.314476	3	1963	GA	HerpNet	AUM
M_fulvius	-81.7354	30.164	5	1963	Florida	NCSM	8160
M_fulvius	-81.362529	30.177858	1	1964	FL	HerpNet	21637
M_fulvius	-87.216766	30.421309	5	1964	FLORIDA	HerpNet	69356
M_fulvius	-82.531083	27.335328	4	1965	Florida	HerpNet	195024
M_fulvius	-89.518265	30.92747	5	1965	Mississippi	MISS	2229
M_fulvius	-88.997502	31.094698	5	1965	Mississippi	MISS	2237
M_fulvius	-78.2213	33.9237	5	1965	North Carolina	NCSM	3978
M_fulvius	-87.075	33.125	5	1966	AL	HerpNet	AUM
M_fulvius	-80.457046	27.44672	2	1966	Florida	HerpNet	561125
M_fulvius	-81.43069	31.80715	3	1967	Georgia	gbif	2882
M_fulvius	-86.553881	31.110703	1	1967	AL	HerpNet	AUM
M_fulvius	-85.864713	31.034147	3	1967	AL	HerpNet	AUM
M_fulvius	-87.873277	31.378042	0	1967	Alabama	HerpNet	162524
M_fulvius	-80.593653	25.383347	0	1967	FLORIDA	HerpNet	46795
M_fulvius	-89.542858	31.160183	5	1967	Mississippi	MISS	8689
M_fulvius	-81.84087	31.66772	0	1968	Georgia	gbif	2883
M_fulvius	-86.13571	33.452319	1	1968	Alabama	HerpNet	165918
M_fulvius	-83.155583	30.392776	2	1968	Florida	HerpNet	82096
M_fulvius	-80.335616	26.714587	5	1968	Florida	HerpNet	25983
M_fulvius	-80.650775	32.414063	1	1968	SOUTH CAROLINA	HerpNet	92189
M_fulvius	-81.645627	28.803551	3	1969	Florida	gbif	2886
M_fulvius	-87.710788	31.555837	3	1969	AL	HerpNet	AUM
M_fulvius	-86.253928	30.865846	2	1969	FL	HerpNet	AUM
M_fulvius	-77.8939	34.0388	5	1969	North Carolina	NCSM	7653
M_fulvius	-87.865793	30.854467	1	1970	AL	HerpNet	AUM
M_fulvius	-89.498886	31.362661	5	1970	Mississippi	MISS	2246
M_fulvius	-81.973	29.5847	3	1970	Florida	NCSM	63281
M_fulvius	-81.0229	29.2106	5	1970	Florida	NCSM	9179
M_fulvius	-80.304199	25.285423	2	1971	Florida	gbif	2880
M_fulvius	-81.249298	31.723825	1	1971	Georgia	gbif	2888
M_fulvius	-89.263071	31.32805	5	1971	Mississippi	MISS	2227
M_fulvius	-85.327471	31.353771	2	1972	AL	HerpNet	AUM
M_fulvius	-80.41864	27.70665	5	1972	Florida	HerpNet	75839
M_fulvius	-86.607132	30.708154	30	1972	Florida	HerpNet	68132
M_fulvius	-81.65373	27.968793	35	1972	Florida	HerpNet	120567
M_fulvius	-83.593873	31.341098	5	1972	Georgia	HerpNet	6550
M_fulvius	-89.189543	31.056102	5	1972	Mississippi	MISS	2226
M_fulvius	-81.595161	31.904415	3	1973	Georgia	gbif	2897
M_fulvius	-87.895826	31.517272	0	1973	AL	HerpNet	AUM
M_fulvius	-81.639385	31.61582	1	1974	Georgia	gbif	2894
M_fulvius	-81.828737	31.759933	3	1974	Georgia	gbif	2893
M_fulvius	-81.678489	31.433593	5	1974	Georgia	gbif	2895
M_fulvius	-84.99204	30.030786	0	1974	FL	HerpNet	AUM
M_fulvius	-86.141199	30.500429	0	1974	FL	HerpNet	AUM
M_fulvius	-81.576812	29.121708	0	1974	Florida	HerpNet	82113
M_fulvius	-85.281631	30.803971	3	1974	Florida	HerpNet	82996
M_fulvius	-82.10998333	30.95191667	5	1974	georgia	idigbio	259275
M_fulvius	-82.3288	29.536	0	1974	Florida	NCSM	15888
M_fulvius	-82.597251	30.669471	2	1975	Georgia	gbif	2896
M_fulvius	-81.448999	32.297683	2	1975	Georgia	gbif	2899
M_fulvius	-81.194291	31.813503	5	1975	Georgia	gbif	2900
M_fulvius	-81.49737	32.03982	5	1975	Georgia	gbif	2898
M_fulvius	-81.62993	26.709073	3	1975	FL	HerpNet	39608
M_fulvius	-82.450906	29.630557	0	1975	Florida	HerpNet	210104
M_fulvius	-82.55137	29.51517	2	1975	florida	idigbio	10501
M_fulvius	-81.368968	31.509253	3	1976	Georgia	gbif	2927
M_fulvius	-88.292274	30.858106	3	1976	AL	HerpNet	AUM
M_fulvius	-82.508383	30.199175	3	1976	Florida	HerpNet	210105
M_fulvius	-81.309738	27.426546	33	1976	Florida	HerpNet	120491
M_fulvius	-90.762038	31.505055	5	1976	Mississippi	MISS	2242
M_fulvius	-81.852118	31.93285	5	1977	Georgia	gbif	2906
M_fulvius	-83.678001	30.086934	30	1977	Florida	HerpNet	42397
M_fulvius	-84.282371	33.213612	5	1977	GA	HerpNet	AUM
M_fulvius	-81.829073	29.490458	0	1978	Florida	HerpNet	82122
M_fulvius	-90.759325	31.270133	5	1978	Mississippi	MISS	2225
M_fulvius	-80.330551	27.440762	5	1979	Florida	gbif	ZMUC-R65489
M_fulvius	-81.460584	31.255824	1	1979	Georgia	gbif	2926
M_fulvius	-82.416207	32.196834	2	1979	Georgia	gbif	2911
M_fulvius	-77.983	34.2831	5	1979	North Carolina	NCSM	20272
M_fulvius	-82.461002	27.956766	5	1980	Florida	HerpNet	39070
M_fulvius	-82.026266	30.831776	5	1980	Georgia	HerpNet	19299
M_fulvius	-82.24451	27.941338	3	1981	Florida	gbif	35292
M_fulvius	-81.087088	28.168301	38	1981	Florida	HerpNet	120534
M_fulvius	-81.782792	31.500795	3	1982	Georgia	gbif	2917
M_fulvius	-90.983067	31.480478	5	1982	Mississippi	MISS	2243
M_fulvius	-82.5564	28.5251	3	1982	Florida	NCSM	64439
M_fulvius	-82.7199	29.0328	5	1982	Florida	NCSM	64440
M_fulvius	-82.3063	29.1865	5	1982	Florida	NCSM	64436
M_fulvius	-81.34037	28.72697	0	1983	Florida	gbif	R-166907
M_fulvius	-89.417345	31.481396	5	1983	Mississippi	MISS	2240
M_fulvius	-81.768282	27.489682	1	1984	Florida	gbif	2921
M_fulvius	-82.040531	30.544258	1	1984	Georgia	gbif	2923
M_fulvius	-82.074987	30.739947	2	1984	Georgia	gbif	2939
M_fulvius	-82.519	29.3267	5	1984	Florida	NCSM	64438
M_fulvius	-78.5064	34.5913	5	1984	North Carolina	NCSM	25054
M_fulvius	-81.44295	28.48521	3	1985	Florida	gbif	R-170335
M_fulvius	-81.20768	28.60354	0	1985	Florida	gbif	R-170336
M_fulvius	-81.74466	32.124975	1	1985	Georgia	gbif	2933
M_fulvius	-80.252423	27.124009	1	1986	Florida	gbif	301638
M_fulvius	-81.799471	31.076426	5	1986	Georgia	gbif	2935
M_fulvius	-82.31089	31.903588	5	1986	Georgia	gbif	2934
M_fulvius	-81.351214	32.151524	2	1988	Georgia	gbif	2936
M_fulvius	-83.137123	29.592554	25	1989	Florida	HerpNet	73221
M_fulvius	-82.36125	29.67825	5	1990	Florida	ASU	88991
M_fulvius	-81.219436	28.803497	1	1990	Florida	HerpNet	309728
M_fulvius	-81.72017	26.11176	1	1991	Florida	gbif	R-178382
M_fulvius	-82.170417	28.507851	0.5	1991	Florida	HerpNet	178659
M_fulvius	-84.76484	30.31278	0.1	1992	Florida	gbif	R-177907
M_fulvius	-81.783957	26.277015	1	1992	Florida	HerpNet	12903
M_fulvius	-81.88425	31.217199	5	1992	Georgia	HerpNet	37090
M_fulvius	-89.038635	31.205177	2	1993	Mississippi	HerpNet	55870
M_fulvius	-84.62196	29.95444	0.1	1994	Florida	gbif	R-176733
M_fulvius	-80.288267	26.974998	1	1994	Florida	HerpNet	58009
M_fulvius	-82.389029	28.537627	3	1994	Florida	HerpNet	195959
M_fulvius	-88.680362	30.975522	1	1994	Mississippi	HerpNet	57611
M_fulvius	-78.2077	34.5156	0	1995	North Carolina	NCSM	37878
M_fulvius	-82.336789	28.69027	1	1998	Florida	HerpNet	208636
M_fulvius	-82.29356	28.778281	1	1998	Florida	HerpNet	208637
M_fulvius	-81.6814	30.9177	1	1999	Georgia	gbif	24034
M_fulvius	-80.217056	26.286537	5	1999	Florida	HerpNet	208639
M_fulvius	-84.99125	30.277667	0	2000	Florida	HerpNet	214347
